# Supplementary material for: Motion-Based Baby Schema in Infant Gait: Inversion Effect and the Influence of Maternal Experience
Source: Research Square preprint supplement (doi:10.21203/rs.3.rs-6320584/v1), 2025-05-15
Supplement: Supplementary file 1 [file b33082efa11720c6f8df7c88.docx]

Supplementary 1. One-sample t-tests comparing mean scores to zero by each group

| Dimension | Pair | Orientation |  | Mothers | | |  | Female Students | | |  | Male Students | | |
| --- | --- | --- | --- | --- | --- | --- | --- | --- | --- | --- | --- | --- | --- | --- |
|  | *t* | *p* | *Cohen’s d* |  | *t* | *p* | *Cohen’s d* |  | *t* | *p* | *Cohen’s d* |
| Cuteness | Infant vs. Adult | Upright |  | 2.05 | 0.046 | 0.28 |  | 1.87 | 0.066 | 0.24 |  | 1.61 | 0.112 | 0.20 |
|  |  | Inversed |  | -0.73 | 0.466 | -0.10 |  | -2.37 | 0.021 | -0.31 |  | 0.13 | 0.899 | 0.02 |
|  | Infant vs. Preschooler | Upright |  | 1.63 | 0.109 | 0.22 |  | 0.75 | 0.456 | 0.10 |  | 1.35 | 0.181 | 0.17 |
|  |  | Inversed |  | 0.94 | 0.353 | 0.13 |  | 0.27 | 0.790 | 0.03 |  | 1.35 | 0.182 | 0.17 |
|  | Preschooler vs. Adult | Upright |  | 0.36 | 0.718 | 0.05 |  | 1.35 | 0.183 | 0.17 |  | 0.98 | 0.332 | 0.12 |
|  |  | Inversed |  | -1.53 | 0.132 | -0.21 |  | -1.01 | 0.314 | -0.13 |  | 0.82 | 0.413 | 0.10 |
| Clumsiness | Infant vs. Adult | Upright |  | 5.29 | <0.001 | 0.71 |  | 9.47 | <0.001 | 1.22 |  | 8.64 | <0.001 | 1.10 |
|  |  | Inversed |  | 1.99 | 0.052 | 0.27 |  | 5.27 | <0.001 | 0.68 |  | 3.32 | 0.002 | 0.42 |
|  | Infant vs. Preschooler | Upright |  | 7.57 | <0.001 | 1.02 |  | 9.24 | <0.001 | 1.19 |  | 5.80 | <0.001 | 0.74 |
|  |  | Inversed |  | 3.45 | 0.001 | 0.47 |  | 4.72 | <0.001 | 0.61 |  | 2.47 | 0.016 | 0.31 |
|  | Preschooler vs. Adult | Upright |  | -0.36 | 0.718 | -0.05 |  | 0.74 | 0.464 | 0.10 |  | 0.20 | 0.843 | 0.03 |
|  |  | Inversed |  | 1.50 | 0.140 | 0.20 |  | 0.12 | 0.904 | 0.02 |  | 1.49 | 0.142 | 0.19 |
| Familiarity | Infant vs. Adult | Upright |  | 0.09 | 0.932 | 0.01 |  | -2.28 | 0.026 | -0.29 |  | -0.94 | 0.351 | -0.12 |
|  |  | Inversed |  | -0.15 | 0.881 | -0.02 |  | 0.40 | 0.694 | 0.05 |  | -0.92 | 0.359 | -0.12 |
|  | Infant vs. Preschooler | Upright |  | -0.06 | 0.950 | -0.01 |  | -1.95 | 0.056 | -0.25 |  | -1.28 | 0.207 | -0.16 |
|  |  | Inversed |  | -0.53 | 0.595 | -0.07 |  | 1.07 | 0.290 | 0.14 |  | -0.41 | 0.683 | -0.05 |
|  | Preschooler vs. Adult | Upright |  | 0.14 | 0.891 | 0.02 |  | 1.36 | 0.180 | 0.18 |  | 1.99 | 0.051 | 0.25 |
|  |  | Inversed |  | 0.00 | 0.997 | 0.00 |  | -0.20 | 0.838 | -0.03 |  | 0.75 | 0.456 | 0.10 |
| Helping Desire | Infant vs. Adult | Upright |  | 6.43 | <0.001 | 0.87 |  | 8.33 | <0.001 | 1.08 |  | 6.22 | <0.001 | 0.79 |
|  | Inversed |  | -0.10 | 0.921 | -0.01 |  | 1.02 | 0.311 | 0.13 |  | 0.45 | 0.653 | 0.06 |
|  | Infant vs. Preschooler | Upright |  | 7.23 | <0.001 | 0.97 |  | 7.19 | <0.001 | 0.93 |  | 5.17 | <0.001 | 0.66 |
|  |  | Inversed |  | 3.43 | 0.001 | 0.46 |  | 3.14 | 0.003 | 0.40 |  | 2.35 | 0.022 | 0.30 |
|  | Preschooler vs. Adult | Upright |  | -0.04 | 0.967 | -0.01 |  | 0.86 | 0.394 | 0.11 |  | 1.88 | 0.064 | 0.24 |
|  |  | Inversed |  | -0.87 | 0.387 | -0.12 |  | -2.11 | 0.039 | -0.27 |  | 1.01 | 0.315 | 0.13 |

*Note. Mothers: N = 55 (df = 54), Female students: N=60 (df=59), Male students: N=62 (df=61)*
